# Supplementary material
Source: PubMed Central journal article supplement (PMC6168027)
Supplement: OPEN-7-797-s001.pdf [file OPEN-7-797-s001.pdf]

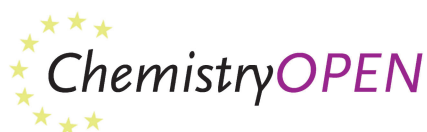

## Supporting Information

© 2018 The Authors. Published by Wiley-VCH Verlag GmbH & Co. KGaA, Weinheim

### **Spaced TiO<sub>2</sub> Nanotubes Enable Optimized Pt Atomic Layer Deposition for Efficient Photocatalytic H<sub>2</sub> Generation**

Selda Ozkan,<sup>[a]</sup> JeongEun Yoo,<sup>[a]</sup> Nhat Truong Nguyen,<sup>[a]</sup> Shiva Mohajernia,<sup>[a]</sup> Raul Zazpe,<sup>[b, c]</sup> Jan Prikryl,<sup>[b]</sup> Jan M. Macak,<sup>[b, c]</sup> and Patrik Schmuki<sup>\*[a, d]</sup>

open\_201800172\_sm\_miscellaneous\_information.pdf

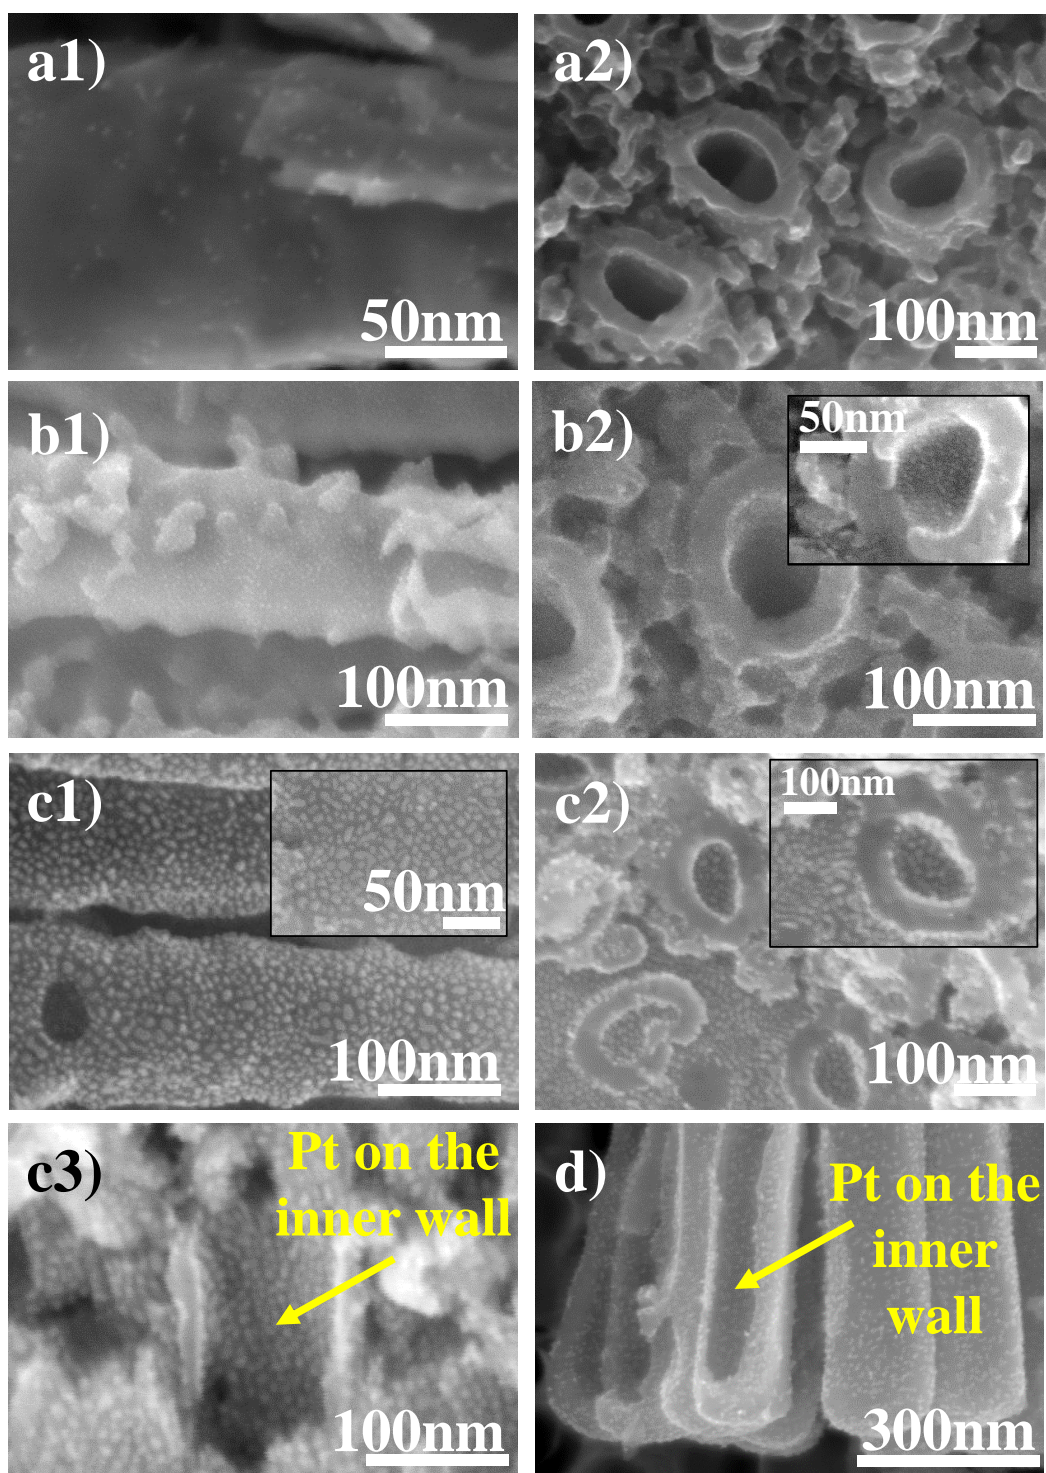

**Figure S1** SEM images show ALD Pt deposited SP NTs: at 2 cycles a1) side view of single tube, a2) view of cracked-off nanotubes: at 10 cycles b1) side view of single tube and b2) view of cracked-off tubes: at 20 cycles c1) side view of single tube, c2) view of cracked-off tubular layer and c3) view of Pt particles on the inner walls. d) SEM image of close-packed NTs at 26 cycles from side view shows the uniform decoration of Pt particles on the inner and outer walls of NTs.

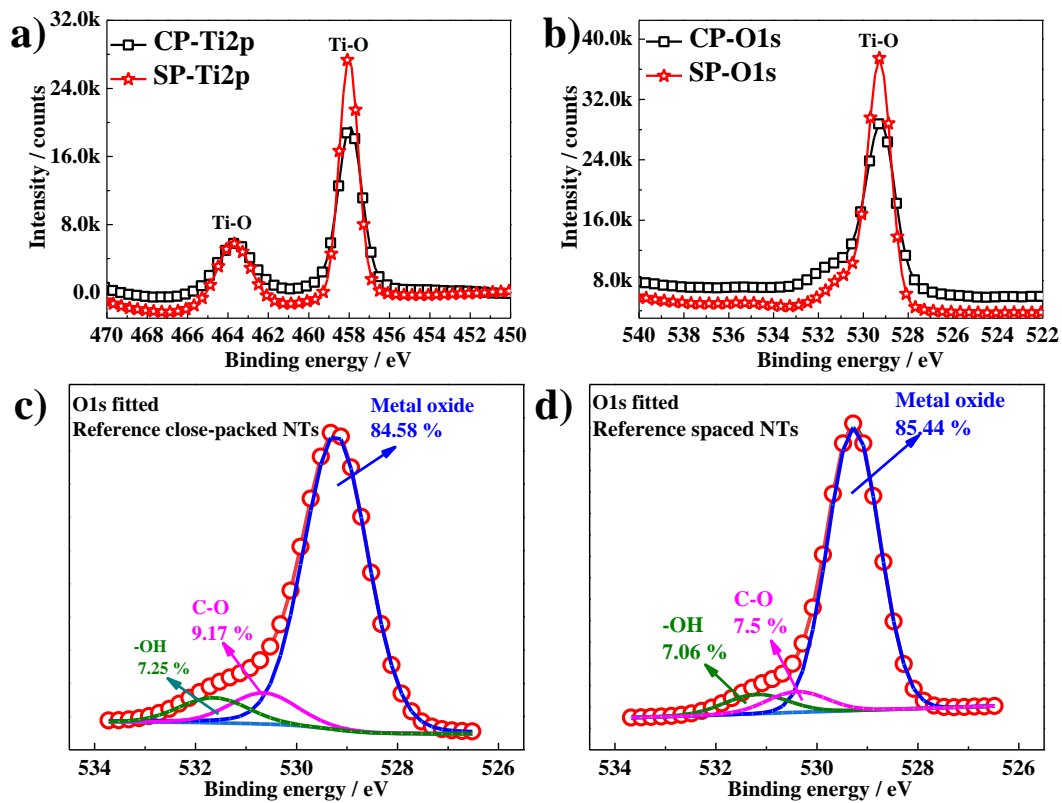

**Figure S2** a) High resolution Ti2p spectra of reference spaced and close-packed NTs. b) High resolution O1s spectra of reference spaced and close-packed NTs. Fitted high-resolution XPS of O1s spectra for reference c) close-packed NTs and d) spaced NTs.

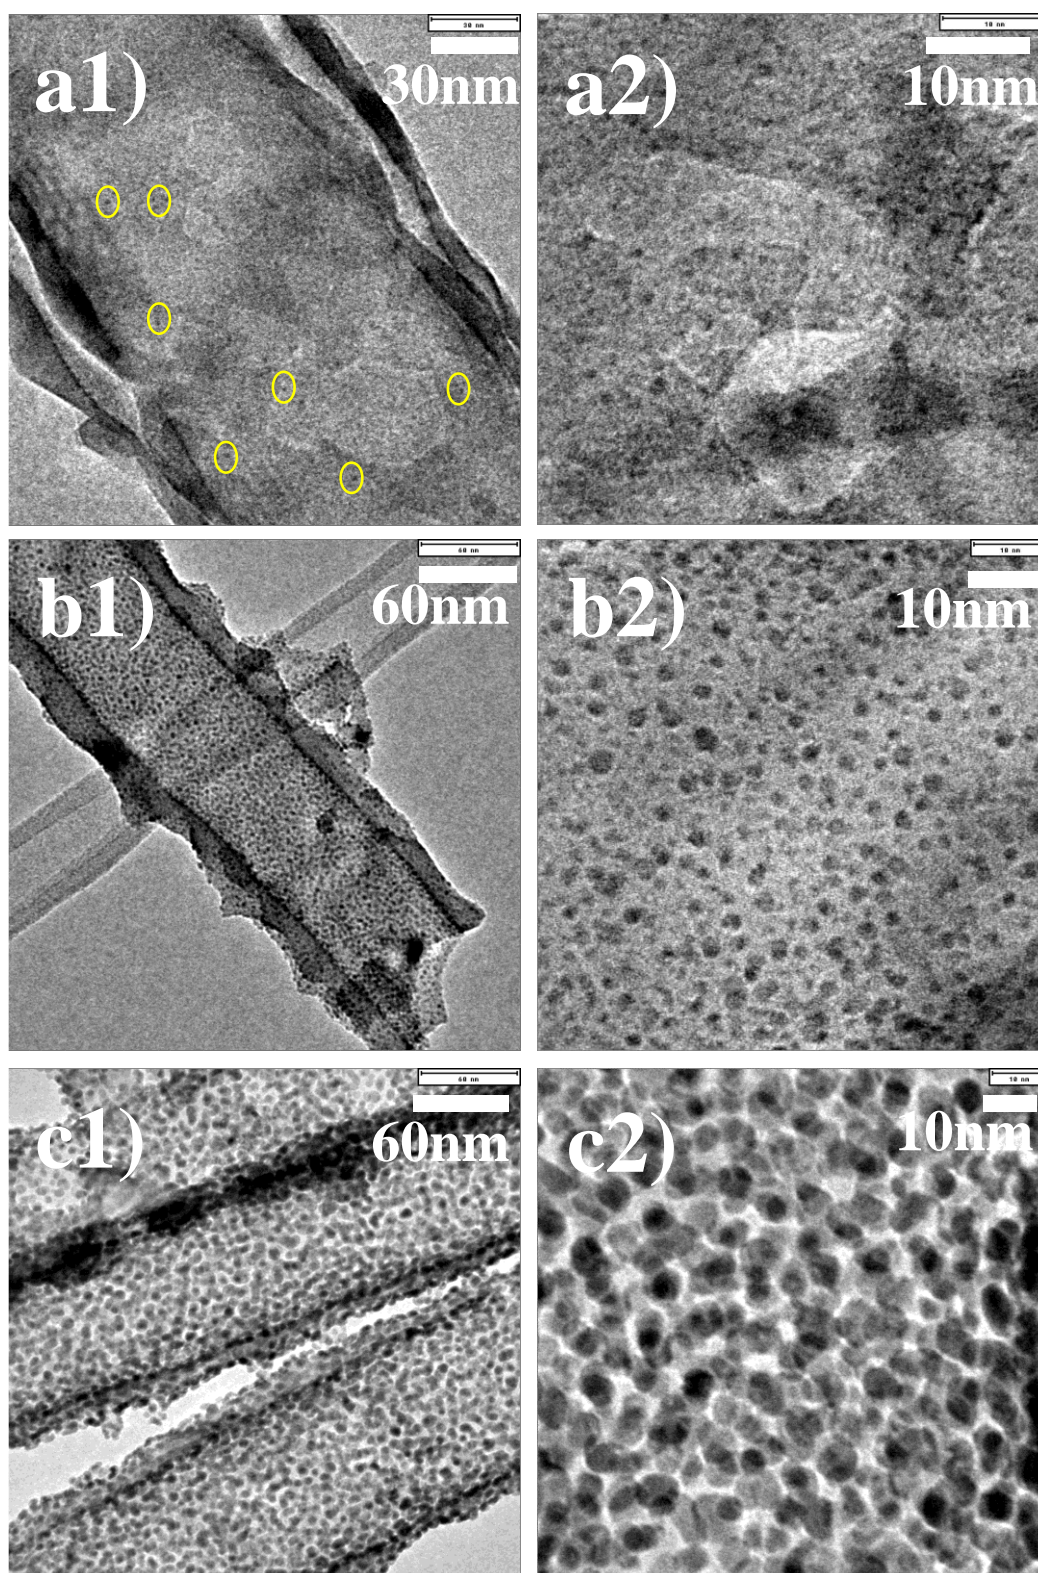

**Figure S3** High resolution TEM images of SP NTs at different cycles: a1-a2) 2 cycles, b1-b2)10 cycles and c1-c2) 20 cycles.

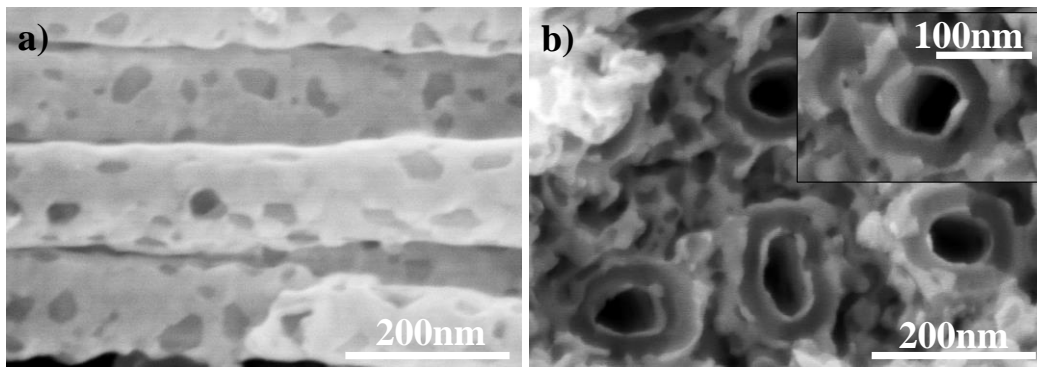

**Figure S4** SEM images of spaced NTs at 72 ALD cycles: a) a side view and b) a top view of cracked-off Pt deposited spaced nanotubes.

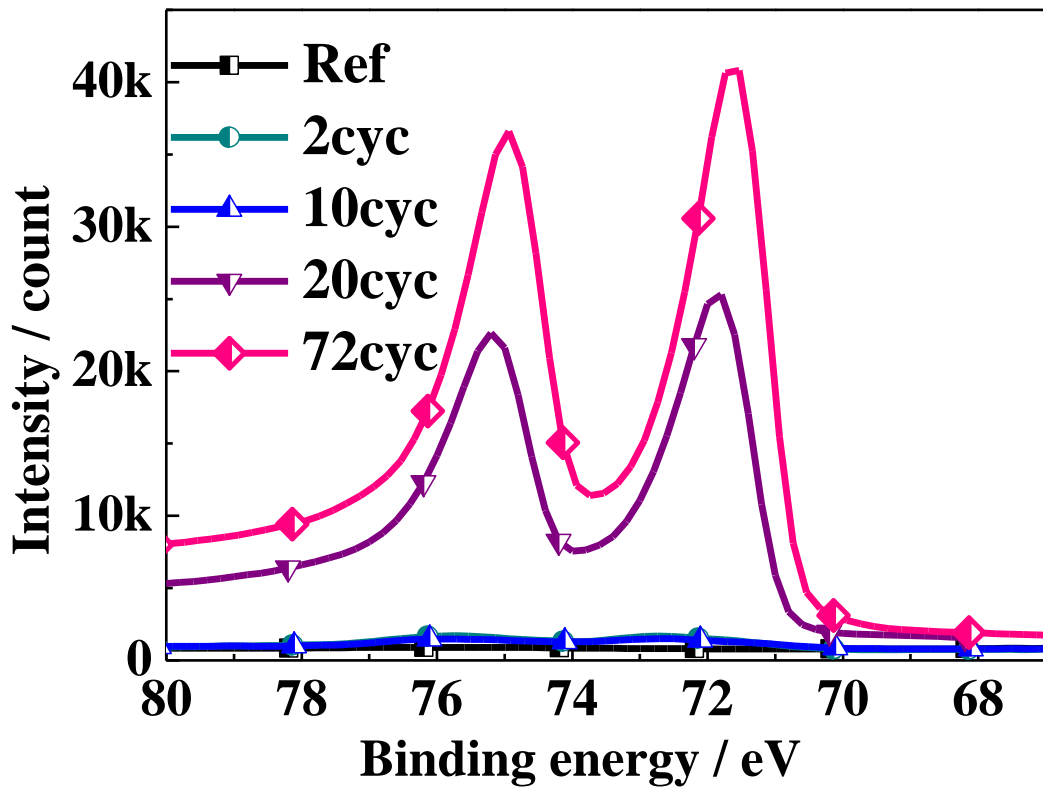

**Figure S5** High resolution Pt<sub>4f</sub> spectra of bare and Pt deposited SP TiO<sub>2</sub> NTs (2, 10, 20 and 72 cycles).

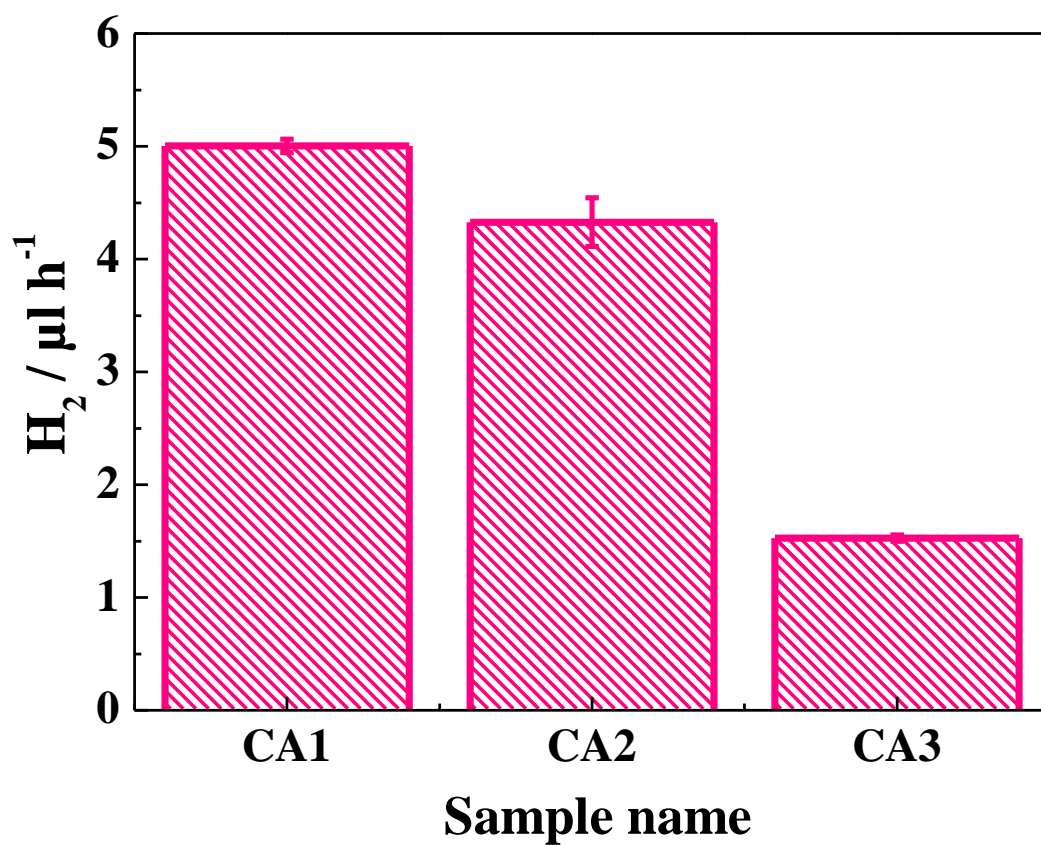

**Figure S6** H<sub>2</sub> evolution rate of Pt deposited SP NTs by conventional sputtering approach under solar illumination (A.M 1.5).

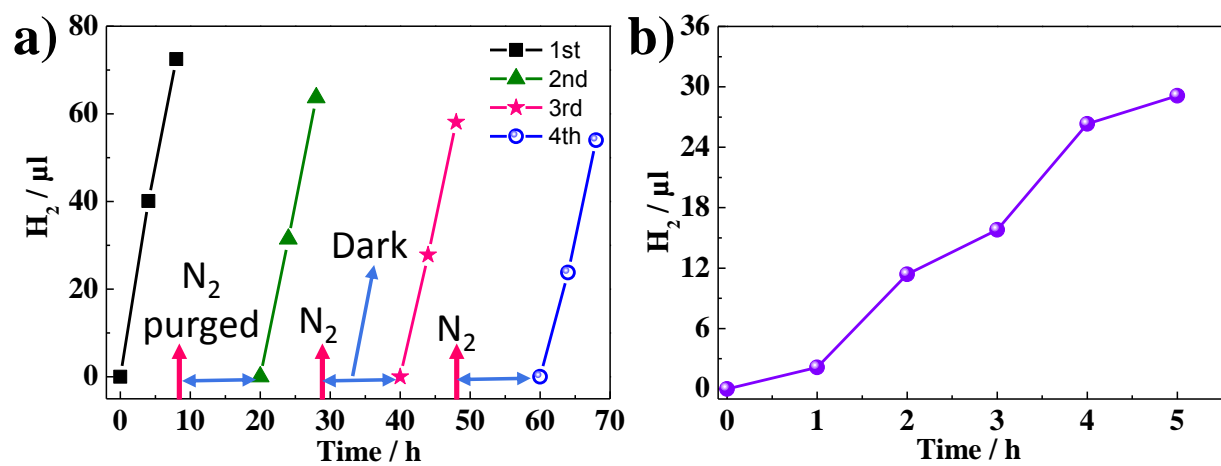

**Figure S7** a) Photocatalytic cycling test of spaced NTs at 10 ALD cycles under solar illumination (A.M 1.5). b) Evolution of  $H_2$  from spaced NTs at 10 ALD cycles over time under solar illumination (A.M 1.5).
